# Supplementary material
Source: PubMed Central journal article supplement (PMC3872968)
Supplement: NIHMS535083-supplement-supp__info_.pdf [file NIHMS535083-supplement-supp__info_.pdf]

# **Quantification of 8-oxodGuo Lesions in Double-Stranded DNA Using a Photoelectrochemical DNA Sensor**

Bintian Zhang<sup>1</sup>, Liang-Hong Guo<sup>1\*</sup>, Marc M. Greenberg<sup>2\*</sup>

<sup>1</sup>*State Key Laboratory of Environmental Chemistry and Ecotoxicology, Research Center for Eco-environmental Sciences, Chinese Academy of Sciences, Beijing 100085, China*

<sup>2</sup>*Department of Chemistry, Johns Hopkins University, 3400 North Charles Street, Baltimore, Maryland 21218, USA*

\*Corresponding Author: (E-mail) LHGuo@rcees.ac.cn; mgreenberg@jhu.edu

## Supporting Information

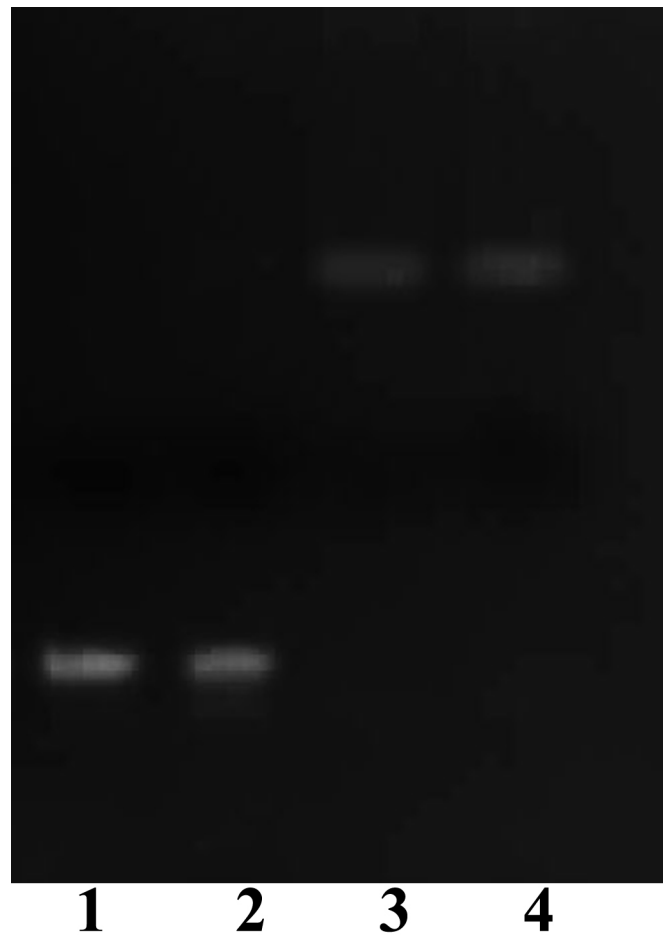

**Figure S1** PAGE electrophoresis images of Duplex 2 after treatment of (1) 20 mM PB buffer, (2) 1 U Fpg solution, (3) 5 U Fpg solution, (4) 10 U Fpg solution for 1 h.

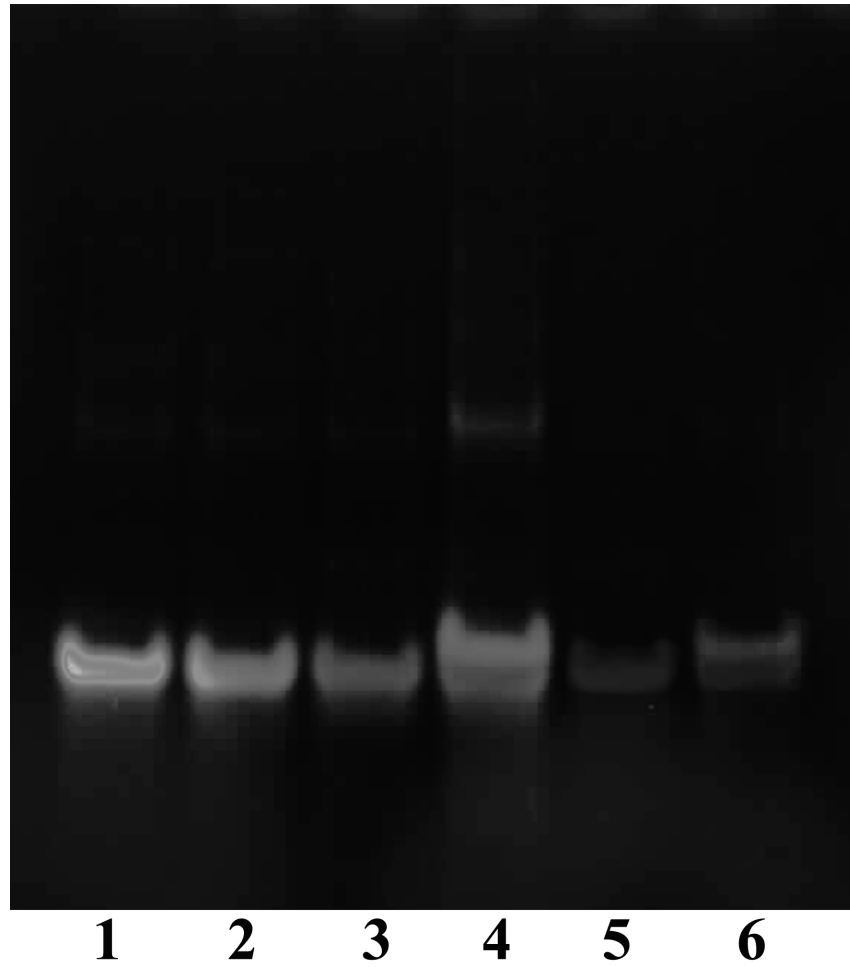

**Figure S2** PAGE electrophoresis images of different types of DNA: (1) Duplex 1, (2) Duplex 1 after biotinylation, (3) Duplex 2, (4) Duplex 2 after biotinylation, (5) Duplex 3, (6) Duplex 3 after biotinylation.

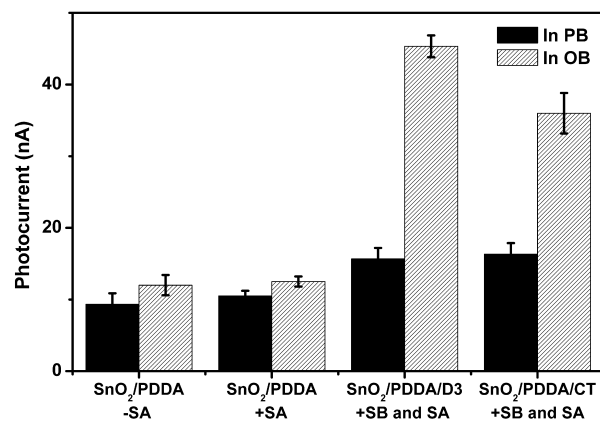

**Figure S3** Photocurrent response of different films in PB buffer and oxalate buffer. **PB**: 20 mM phosphate buffer, pH 7.4; **OB**: 30 mM oxalate buffer, pH 5.8; **-SA**: without the coating of Ru-streptavidin; **+SA**: with the coating of Ru-streptavidin; **SnO<sub>2</sub>/PDDA/D3**: electrodes with the assembly of Duplex 3; **SnO<sub>2</sub>/PDDA/CT**: electrodes with the assembly of CT-DNA after the exposure to 50  $\mu\text{M}$   $\text{Fe}^{2+}$ /200  $\mu\text{M}$   $\text{H}_2\text{O}_2$  for 30 min.
